# Supplementary material for: Insights into the Pharmacokinetics and In Vitro Cell-Based Studies of the Imidazoline I2 Receptor Ligand B06
Source: MDPI journal article supplement (doi:10.3390/ijms23105408), 2022-05-12

# Insights into the pharmacokinetics and *in vitro* cell-based studies of the imidazoline I<sub>2</sub> receptor ligand B06.

Andrea Bagán<sup>1</sup>, José A. Morales-García<sup>2</sup>, Christian Griñán-Ferré<sup>3</sup>, Caridad Díaz<sup>4</sup>, José Pérez del Palacio<sup>4</sup>, Maria C. Ramos<sup>4</sup>, Francisca Vicente<sup>4</sup>, Belén Pérez<sup>5</sup>, José Brea<sup>6</sup>, M. Isabel Loza<sup>6</sup>, Mercè Pallàs<sup>3</sup>, Carmen Escolano<sup>1,\*</sup>

- <sup>1</sup> Laboratory of Medicinal Chemistry (Associated unit to CSIC), Department of Pharmacology, Toxicology and Medicinal Chemistry, Faculty of Pharmacy and Food Sciences, and Institute of Biomedicine (IBUB), University of Barcelona, E-08028, Barcelona, Spain. abaganpolonio@ub.edu (A. B.); cescolano@ub.edu (C. E.).
- <sup>2</sup> Department of Cell Biology. School of Medicine. Complutense University (UCM), 28040 Madrid, Spain and The Network Center for Biomedical Research in Neurodegenerative Diseases (CIBERNED). jmoral06@ucm.es (J. A. M.).
- <sup>3</sup> Pharmacology Section, Toxicology and Medicinal Chemistry, Faculty of Pharmacy and Food Sciences, and Institut de Neurociències, University of Barcelona, E-08028 Barcelona, Spain. christian.grinan@ub.edu (C. G.-F.); pallas@ub.edu (M. P.).
- <sup>4</sup> Fundación MEDINA, Centro de Excelencia en Investigación de Medicamentos Innovadores en Andalucía, Avda. del Conocimiento 34, 18016 Armilla, Granada, Spain. caridad.diaz@medinaandalucia.es (C. D.); jose.perezdelpalacio@medinaandalucia.es (J. P.); carmen.ramos@medinaandalucia.es (M. C. R.); francisca.vicente@medinaandalucia.es (F. V.).
- <sup>5</sup> Department of Pharmacology, Therapeutic, and Toxicology, Autonomous University of Barcelona, E-08193, Barcelona, Spain. belen.perez@uab.cat (B. P.).
- <sup>6</sup> Innopharma screening platform. BioFarma research group. Centro de Investigación en Medicina Molecular y Enfermedades Crónicas (CIMUS). Universidad de Santiago de Compostela, Santiago de Compostela, Spain. pepo.brea@usc.es (J. B.); mabel.loza@usc.es (M.I. L.).

\* Correspondence: cescolano@ub.edu

## CONTENTS:

|                                                                   |     |
|-------------------------------------------------------------------|-----|
| Metabolic stability of B06 in human liver microsomes .....        | S1  |
| Metabolic stability of B06 in mouse liver microsomes .....        | S3  |
| Metabolic profiling of B06 in human liver microsomes .....        | S5  |
| Metabolic profiling of B06 in mouse liver microsomes .....        | S6  |
| Metabolic profiling of B06 <i>in vivo</i> .....                   | S7  |
| Method validation for quantification of B06 in mouse plasma ..... | S8  |
| Method validation for quantification of B06 in mouse brain .....  | S11 |
| <i>In vivo</i> pharmacokinetics of B06 .....                      | S14 |
| SH-SY5Y Human Cell Line .....                                     | S18 |
| <sup>1</sup> H and <sup>13</sup> C NMR spectra .....              | S19 |
| Representative data of <sup>1</sup> H-NMR spectra .....           | S21 |
| HPLC/MS analysis .....                                            | S22 |

## Metabolic stability of B06 in human liver microsomes

**B06** was dissolved in DMSO at 2 mg/mL. Assay conditions, total incubation volume 400  $\mu$ L, **B06** concentration 1  $\mu$ M, protein concentration 1 mg/mL, NADPH, 1.3 mM. Potassium phosphate buffer (100 mM) pH 7.4 and human liver microsomes, were purchased from Beckton Dickinson. Verapamil, MgCl<sub>2</sub> and NaDPH were purchased from Sigma-Aldrich, Germany. The equipment needed for the study was Beckman Coulter Refrigerated centrifuge, Agilent 1290 Infinity Liquid Chromatograph, CTC Analytics PAL HT-xt injector, Api4000 Mass Spectrometer. Total incubation volume 400  $\mu$ L, **B06** concentration 1  $\mu$ M, protein concentration 1 mg/mL, NADPH 1.3 mM.

**Test compound:** a stock solution of **B06** was prepared in DMSO at 25 mM. The final concentration in the assay was 1  $\mu$ M. A stock solution of 2.66 mM NADPH was prepared by dissolving appropriate amount of NADPH in 100 mM potassium phosphate buffer.

**Analysis:** For the data analysis the area ratio of analyzed *versus* internal standard was used to calculate the percentage of remaning compound at each incubation time. The natural logarithm of the percentage of reamining **B06** was plotted versus incubation time to calculate the half-life using the following equation: Half-life ( $T_{1/2}$ ) (min) = 0.693/k (the slope of the natural log of the percent remaining *versus* time). Intrinsic clearance was determined by the following equation:  $CL_{int} = \frac{\ln 2}{t_{1/2}} \times \text{volume incubation (mL)} / \text{microsomal protein (mg)} \times 45$  (MPPGL) 1500 g human liver/ 70 Kg human body weight. Units for  $CL_{int}$  are usually expressed as mL/min/mg microsomal protein, MPPGL = referred to as mg microsomal protein per gram liver [45].

*Table S1. Summary of LC-MS conditions*

| LC- MS Conditions           |                                         |
|-----------------------------|-----------------------------------------|
| HPLC                        | Agilent 1290                            |
| MS/MS                       | Api4000                                 |
| Software                    | Analyst                                 |
| Ionization Mode             | Electrospray positive                   |
| Sample matrix               | Microsomes+ NADPH + buffer              |
| Column                      | Discovery HS C18, 2.1 X 5 mm, 3 $\mu$ m |
| Mobile phase                | [Water: Acetonitrile :0.1% Formic Acid] |
| Flow rate                   | 0.45 mL/min                             |
| Source Temperature (°C)     | 500                                     |
| Column Temperature (°C)     | 20                                      |
| Injection Volume ( $\mu$ L) | 5                                       |
| Run time (min)              | 5                                       |

*Table S2. Percentage of verapamil remaining at each incubation time*

| Verapamil   |                      |
|-------------|----------------------|
| Plus NADPH  |                      |
| Time (min)  | % Compound remaining |
| 0           | 100.00±5.20          |
| 5           | 79.3 ±6.29           |
| 15          | 45.6±3.49            |
| 30          | 19.7±2.47            |
| 45          | 10.4±1.48            |
| 60          | 0.62±0.51            |
| Minus NADPH |                      |
| Time (min)  | % Compound remaining |
| 0           | 105.00±8.08          |
| 60          | 126.00±12.73         |

Table S3. Metabolic stability of B06 and verapamil in human liver

| Compound  | Intrinsic clearance<br>(mL/min/mg protein) | $t_{1/2}$ (min) |
|-----------|--------------------------------------------|-----------------|
| Verapamil | 53.1                                       | 12.6            |
| B06       | 23.5                                       | 28.4            |

Table S4. Compound clearance category classification

| Clearance Category | Intrinsic Clearance ( $\mu\text{L}/\text{min}/\text{mg}$ protein) |
|--------------------|-------------------------------------------------------------------|
|                    | Human                                                             |
| Low                | < 8.6                                                             |
| Medium             | 8.6-47.0                                                          |
| High               | > 47.0                                                            |

Figure S1. Time course of metabolic stability of verapamil in human liver microsomes

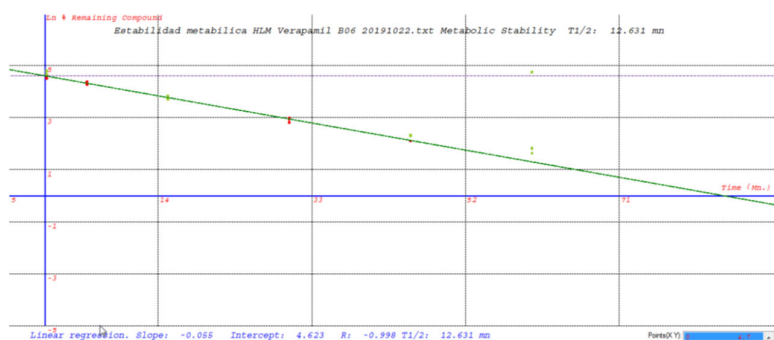

Figure S2. Time course of metabolic stability of B06 in human liver microsomes

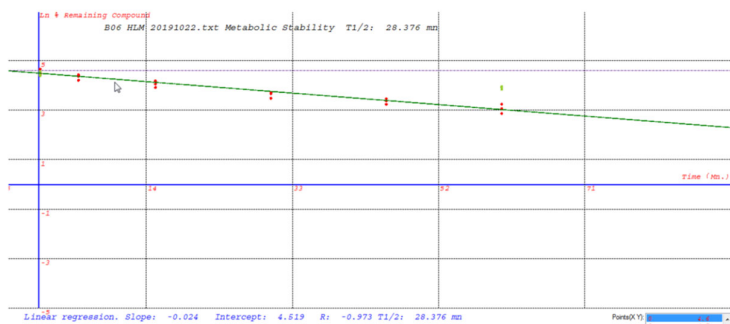

### Metabolic stability of B06 in mouse liver microsomes

A stock solution of **B06** was prepared in DMSO at 2 mg/mL. The final concentration assay was 1  $\mu$ M. A stock solution of 2.66 mM NADPH was prepared by dissolving appropriate amount of NADPH in 100 mM potassium phosphate buffer.

The equipment needed for the study was Agilent 1290 Infinity UHPLC, ABSciex 5600 QTOF Mass Spectrometer, Metabolite Pilot V 1.5 Software.

**Method:** Ionization mode, electrospray positive; adquisition mode, TOF MS with IDA MS/MS; column, Atlantis T3 C18, 2.1 x 15 mm, 3  $\mu$ m; mobile phase, water: acetonitrile: 0.1%: formic acid; flow rate, 0.3 mL/min; source temperature, 550°C; column temperature, 25°C; injection volume, 5  $\mu$ L, run time, 20 min. Total incubation volume 400  $\mu$ L, **B06** concentration 1  $\mu$ M, protein concentration 1 mg/mL, NADPH 1.3 mM.

*Table S5. Summary of LC-MS conditions*

| LC- MS Conditions           |                                         |
|-----------------------------|-----------------------------------------|
| HPLC                        | Agilent 1290                            |
| MS/MS                       | Api4000                                 |
| Software                    | Analyst                                 |
| Ionization Mode             | Electrospray positive                   |
| Sample matrix               | Microsomes+ NADPH + buffer              |
| Column                      | Discovery HS C18, 2.1 X 5 mm, 3 $\mu$ m |
| Mobile phase                | [Water: Acetonitrile :0.1% Formic Acid] |
| Flow rate                   | 0.45 mL/min                             |
| Source Temperature (°C)     | 500                                     |
| Column Temperature (°C)     | 20                                      |
| Injection Volume ( $\mu$ L) | 5                                       |
| Run time (min)              | 5                                       |

| Time (min) | % compound remaining |
|------------|----------------------|
|            | <i>Plus NADPH</i>    |
| 0          | 100.00 $\pm$ 0.40    |
| 45         | 0.08 $\pm$ 0.07      |
| 60         | 0.04 $\pm$ 0.02      |
|            | <i>Minus NADPH</i>   |
| 0          | 78.40 $\pm$ 4.65     |
| 60         | 59.30 $\pm$ 2.63     |

*Table S6. Percentage of verapamil remaining at each incubation time*

*Table S7. Metabolic stability of B06 and verapamil in mouse liver*

| Compound         | Intrinsic clearance (mL/min/mg protein) | t <sub>1/2</sub> (min) |
|------------------|-----------------------------------------|------------------------|
| <b>Verapamil</b> | 485.47                                  | 5.1                    |
| <b>B06</b>       | 153.7                                   | 16.23                  |

$$CL_{\text{int H}} = \frac{\ln 2}{t_{1/2}(\text{min})} * \frac{\text{volume incubation (mL)}}{\text{microsomal protein (mg)}} * 45(\text{MPPGL}) \frac{2 \text{ g mouse liver}}{0.025 \text{ kg mouse body weight}}$$

Table S8. Compound clearance category classification (mouse)

| Clearance Category | Intrinsic Clearance (mL/min/mg protein) |
|--------------------|-----------------------------------------|
|                    | Mouse                                   |
| Low                | < 8.6                                   |
| High               | > 47.0                                  |

Figure S3. Time course of metabolic stability of verapamil in mouse liver microsomes

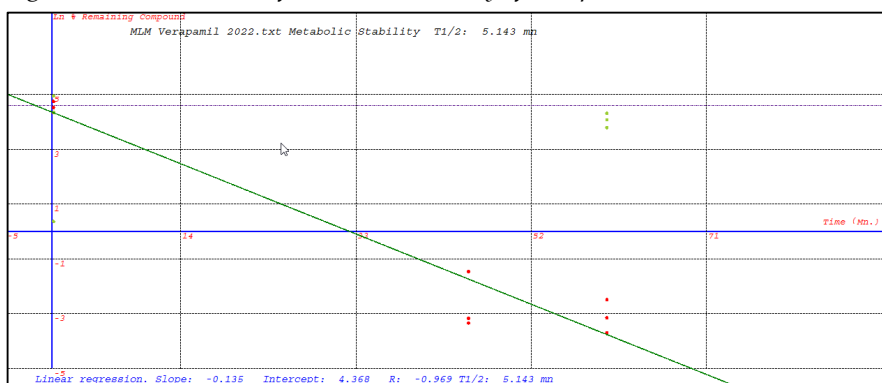

Figure S4. Time course of metabolic stability of B06 in mouse liver microsomes

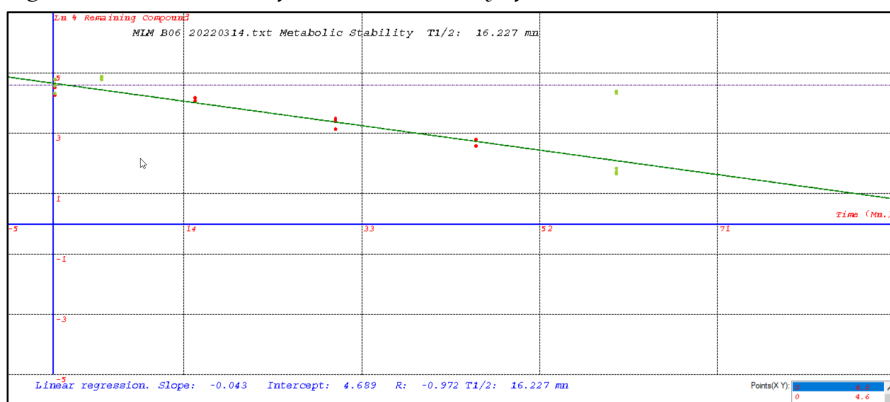

## Metabolic profiling of B06 in human liver microsomes

The equipment used for the analysis was an Agilent 1290 Infinity UHPC, ABSciex 5600 QTOF Mass Spectrometer, Metabolite Pilot V 1.5 Software.

**Method:** ionization mode, electrospray positive; acquisition mode, TOF MS with IDA MS/MS; colum, Atlantis T3 C18, 2.1 × 15 mm, 3 µm; mobile phase, water:acetonitrile: 0.1% formic acid; flow rate, 0.3 mL/min; source temperature, 550°C; column temperature, 25°C; injection volume, 5 µL; run time, 20 min.

All the tentative identified metabolites have been evaluated using of a score (40 value). This score depend on mass defect, isotope pattern, mass accuracy and MS/MS. In all the cases the score was equal or greater than 68%.

*Table S9. Metabolite time course in HLM incubations for B06*

| Peak ID | Description                           | Time incubation (min) | Formula                                                            | m/z      | Mass error (ppm) | R.T. (min) | Peak Area | % Area | % Score |
|---------|---------------------------------------|-----------------------|--------------------------------------------------------------------|----------|------------------|------------|-----------|--------|---------|
| M1      | Loss of C <sub>2</sub> H <sub>4</sub> | 15                    | C <sub>20</sub> H <sub>17</sub> N <sub>2</sub> O <sub>5</sub> FPCl | 451.0625 | 1.0              | 8.94       | 1.75E+04  | 8.4    | 81.1    |
| M1      | Oxidation                             | 30                    | C <sub>20</sub> H <sub>17</sub> N <sub>2</sub> O <sub>5</sub> FPCl | 451.0628 | 1.6              | 8.89       | 2.70E+04  | 17.8   | 75.0    |
| M1      | Loss of C <sub>2</sub> H <sub>4</sub> | 45                    | C <sub>20</sub> H <sub>17</sub> N <sub>2</sub> O <sub>5</sub> FPCl | 451.0624 | 0.8              | 8.97       | 3.70E+04  | 26.2   | 85.5    |
| M1      | Loss of C <sub>2</sub> H <sub>4</sub> | 60                    | C <sub>20</sub> H <sub>17</sub> N <sub>2</sub> O <sub>5</sub> FPCl | 451.0624 | 0.9              | 8.90       | 4.03E+04  | 36.0   | 81.8    |

*Figure S5. Metabolite time course in HLM incubations from 0 to 60 min for B06*

### Linear Graph Correlation (Peak Area)

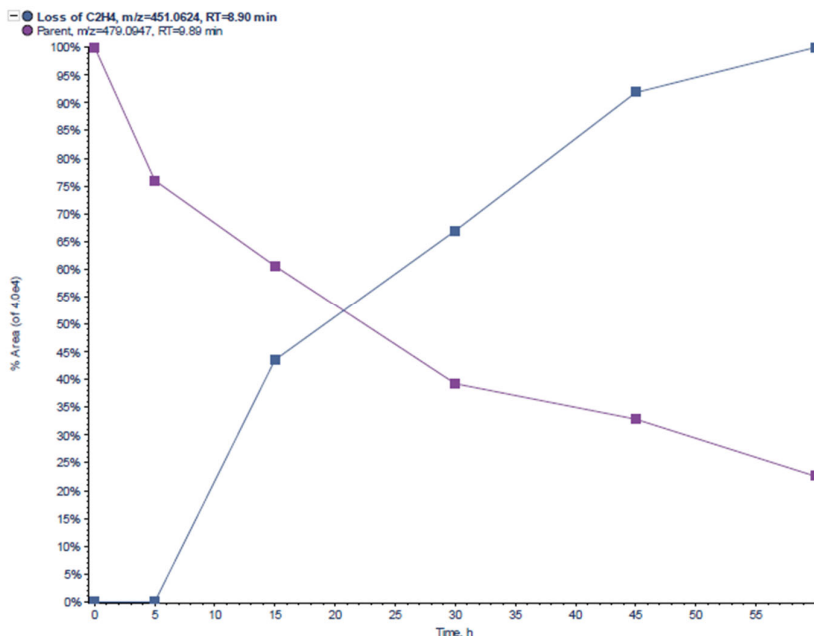

## Metabolic profiling of B06 in mouse liver microsomes

The equipment used for the analysis was an Agilent 1290 Infinity UHPC, ABSciex 5600 QTOF Mass Spectrometer, Metabolite Pilot V 1.5 Software.

**Method:** ionization mode, electrospray positive; acquisition mode, TOF MS with IDA MS/MS; column, Atlantis T3 C18, 2.1 × 15 mm, 3 μm; mobile phase, water:acetonitrile: 0.1% formic acid; flow rate, 0.3 mL/min; source temperature, 550°C; column temperature, 25°C; injection volume, 5 μL; run time, 20 min.

All the tentative identified metabolites have been evaluated using of a score (40 value). This score depend on mass defect, isotope pattern, mass accuracy and MS/MS. In all the cases the score was equal or greater than 68%.

All analytical determinations of **B06** were performed in according to the recommendations of the FDA.<sup>1</sup>

*Table S10. Metabolite time course in MLM incubations for B06*

| Peak ID | Description                           | Time incubation (min) | Formula                                                            | m/z      | Mass error (ppm) | R.T. (min) | Peak Area | % Area | % Score |
|---------|---------------------------------------|-----------------------|--------------------------------------------------------------------|----------|------------------|------------|-----------|--------|---------|
| M1      | Loss of C <sub>2</sub> H <sub>4</sub> | 5                     | C <sub>20</sub> H <sub>17</sub> N <sub>2</sub> O <sub>5</sub> FPCl | 451.0620 | 0.0              | 8.88       | 2.74E+04  | 10.7   | 88.8    |
| M1      | Loss of C <sub>2</sub> H <sub>4</sub> | 15                    | C <sub>20</sub> H <sub>17</sub> N <sub>2</sub> O <sub>5</sub> FPCl | 451.0623 | 0.5              | 8.87       | 7.47E+04  | 30.9   | 90.8    |
| M1      | Loss of C <sub>2</sub> H <sub>4</sub> | 30                    | C <sub>20</sub> H <sub>17</sub> N <sub>2</sub> O <sub>5</sub> FPCl | 451.0617 | -0.9             | 8.87       | 1.14E+05  | 60.9   | 92.0    |
| M1      | Loss of C <sub>2</sub> H <sub>4</sub> | 45                    | C <sub>20</sub> H <sub>17</sub> N <sub>2</sub> O <sub>5</sub> FPCl | 451.0623 | 0.6              | 8.83       | 1.06E+05  | 81.6   | 93.0    |
| M1      | Loss of C <sub>2</sub> H <sub>4</sub> | 60                    | C <sub>20</sub> H <sub>17</sub> N <sub>2</sub> O <sub>5</sub> FPCl | 451.0620 | -0.1             | 8.80       | 1.02E+05  | 88.9   | 92.5    |

*Figure S6. Metabolite time course in MLM incubations from 0 to 60 min for B06*

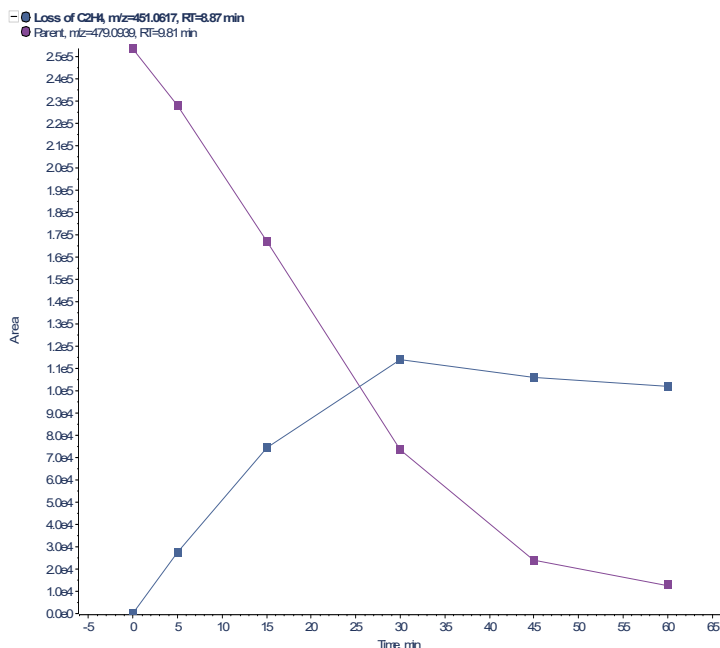

<sup>1</sup> Safety testing of drug metabolites. Guidance for industry. U.S. Department of Health and Human Services Food and Drug Administration Center for Drug Evaluation and Research (CDER) March 2020 Pharmacology/Toxicology. <https://www.fda.gov/regulatory-information/search-fda-guidance-documents/safety-testing-drug-metabolites>



## Metabolic profiling of B06 *in vivo*

Table S11. Metabolite time course in vivo incubations for B06

| Name        | R.T.<br>(min) | MS Area<br>30 min | MS Area<br>60 min | MS Area<br>120 min | MS Area<br>240 min | MS Area<br>360 min | MS Area<br>480 min |
|-------------|---------------|-------------------|-------------------|--------------------|--------------------|--------------------|--------------------|
| Oxidation 1 | 7.82          | 2.94E03           | 2.40E03           | 3.53E03            | 9.32E03            | 2.36E03            | 3.53E03            |
| Oxidation 2 | 7.98          | x                 | x                 | 2.08E03            | x                  | x                  | x                  |
| Parent      | 9.38          | 1.16E05           | 8.40E04           | 5.73E04            | 1.36E05            | 3.26E04            | 7.44E04            |

Figure S7. Metabolite time course in HLM incubations from 0 to 60 min for B06

### Linear Graph Correlation (Peak Area)

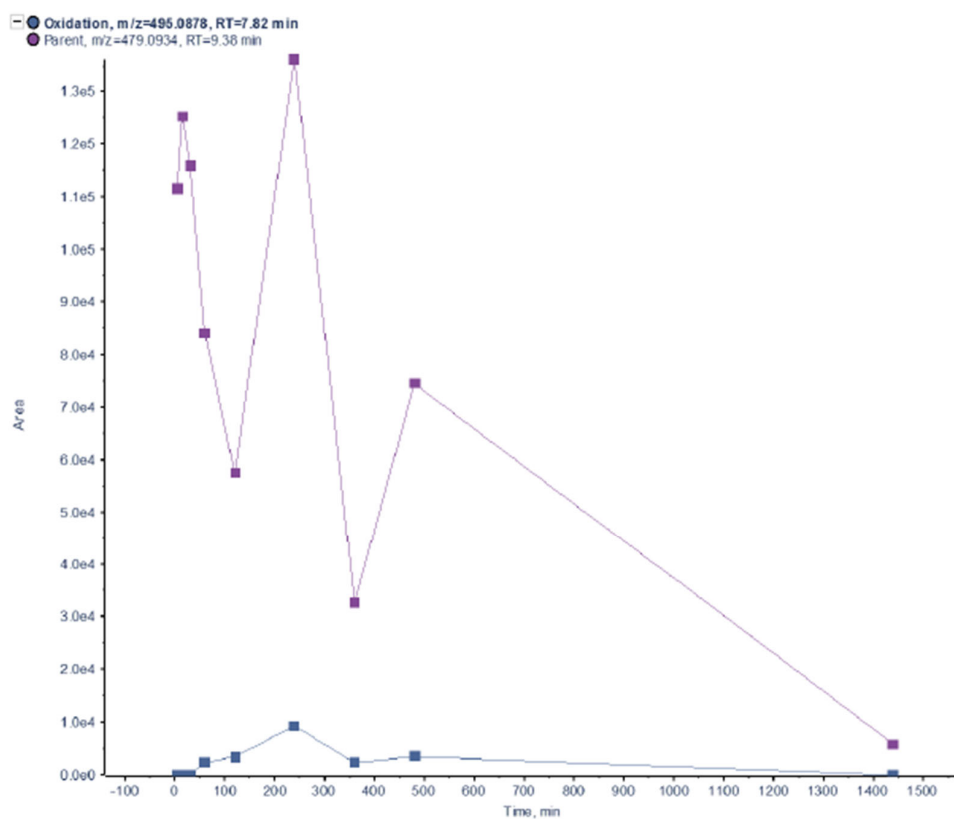

## Method validation for quantification of B06 in mouse plasma

*Table S12. Specificity of B06 and internal standard in mouse plasma samples*

|         | Peak area at B06<br>RT in Blank | Peak area at B06<br>RT in LLOQ<br>Sample | Blank<br>Peak area at B06<br>RT<br>(% of LLOQ) | Peak area at<br>IS RT in<br>Blank | Peak area at IS<br>RT in LLOQ<br>Sample | Blank<br>Peak area at<br>IS<br>(% of LLOQ) |
|---------|---------------------------------|------------------------------------------|------------------------------------------------|-----------------------------------|-----------------------------------------|--------------------------------------------|
| Blank 1 | 346                             | 2310                                     | 14.98                                          | 11                                | 277000                                  | 0.004                                      |
| Blank 2 | 190                             | 1640                                     | 11.59                                          | 15                                | 268000                                  | 0.006                                      |
| Blank 3 | 271                             | 1540                                     | 17.60                                          | 13                                | 264000                                  | 0.005                                      |
| Blank 4 | 182                             | 1640                                     | 11.10                                          | 10                                | 261000                                  | 0.004                                      |
| Blank 5 | 226                             | 1690                                     | 13.37                                          | 17                                | 243000                                  | 0.007                                      |
| Blank 6 | 216                             | 1480                                     | 14.59                                          | 13                                | 265000                                  | 0.005                                      |
| n       | 6                               | 6                                        | 6                                              | 6                                 | 6                                       | 6                                          |
| Mean    | 239                             | 1717                                     | 13.9                                           | 13                                | 263000                                  | 0.005                                      |

*Table S13. Auto-sampler carry over test of B06 and internal standard in mouse plasma samples*

| Sample Name | Analyte | IS     | % Carry Over |     |
|-------------|---------|--------|--------------|-----|
|             |         |        | Analyte      | IS  |
| STD BLANK   | 347     | 70     |              |     |
| LLOQ        | 1880    | 339000 |              |     |
| ULOQ        | 264000  | 305000 |              |     |
| STD BLANK   | 328     | 171    | 17.4         | 0.6 |

*Table S14. Back calculated values (ng/ml) data of cc standard for B06 in mouse plasma samples*

| Run Date                              | STD Conc. (ng/ml) | 5.0   | 10.0  | 40.0 | 80.0 | 160.0 | 320.0 | 640.0 |
|---------------------------------------|-------------------|-------|-------|------|------|-------|-------|-------|
| September                             | Run 1             | 4.9   | 10.9  | 38.4 | 77.0 | 148.8 | 308.5 | 670.0 |
|                                       | Run 2             | 5.2   | 10.9  | 40.1 | 81.8 | 141.0 | 322.4 | 649.5 |
| Mean Calculated Concentration (ng/mL) |                   | 5.0   | 10.9  | 39.6 | 79.4 | 144.8 | 315.5 | 659.7 |
| Accuracy (%)                          |                   | 100.8 | 108.6 | 99.1 | 99.3 | 90.5  | 98.6  | 103.1 |
| Precision (CV %)                      |                   | 3.9   | 0.4   | 4.6  | 4.2  | 3.9   | 3.1   | 2.2   |
| n                                     |                   | 2     | 2     | 2    | 2    | 2     | 2     | 2     |

*Table S15. Accuracy and precision of B06 in mouse plasma samples*

| Run Date         | LQC<br>(5.0 ng/mL) | MQC<br>(71.1 ng/mL) | HQC<br>(640.0 ng/mL) |
|------------------|--------------------|---------------------|----------------------|
| September        | 6.7                | 71.3                | 666.1                |
|                  | 5.2                | 76.2                | 652.7                |
|                  | 5.0                | 70.7                | 638.5                |
|                  | 5.3                | 72.2                | 663.3                |
|                  | 5.7                | 68.9                | 609.1                |
|                  | 4.8                | 73.4                | 622.4                |
| Mean             | 5.4                | 72.1                | 642.0                |
| Precision (CV %) | 12.6               | 3.5                 | 3.6                  |
| Accuracy (%)     | 108.7              | 101.6               | 100.3                |
| n                | 6                  | 6                   | 6                    |

Figure S8. Blank sample chromatogram of B06 and internal standard in mouse plasma samples

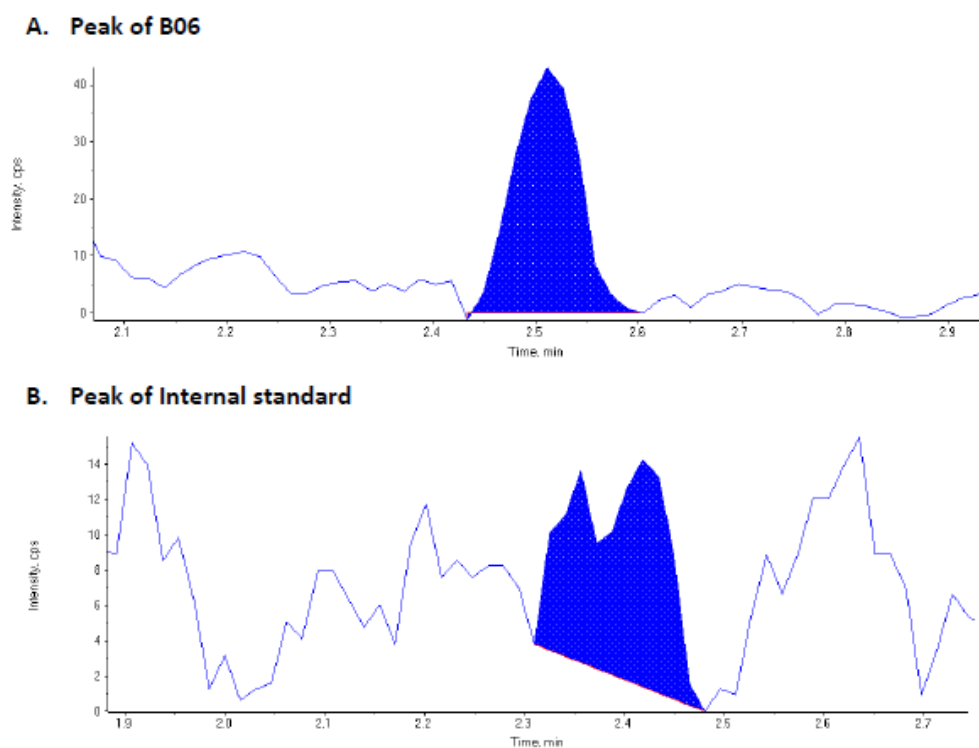

Figure S9. Chromatogram of B06 and internal standard in lloq sample in mouse plasma samples (concentration 5 ng/ml)

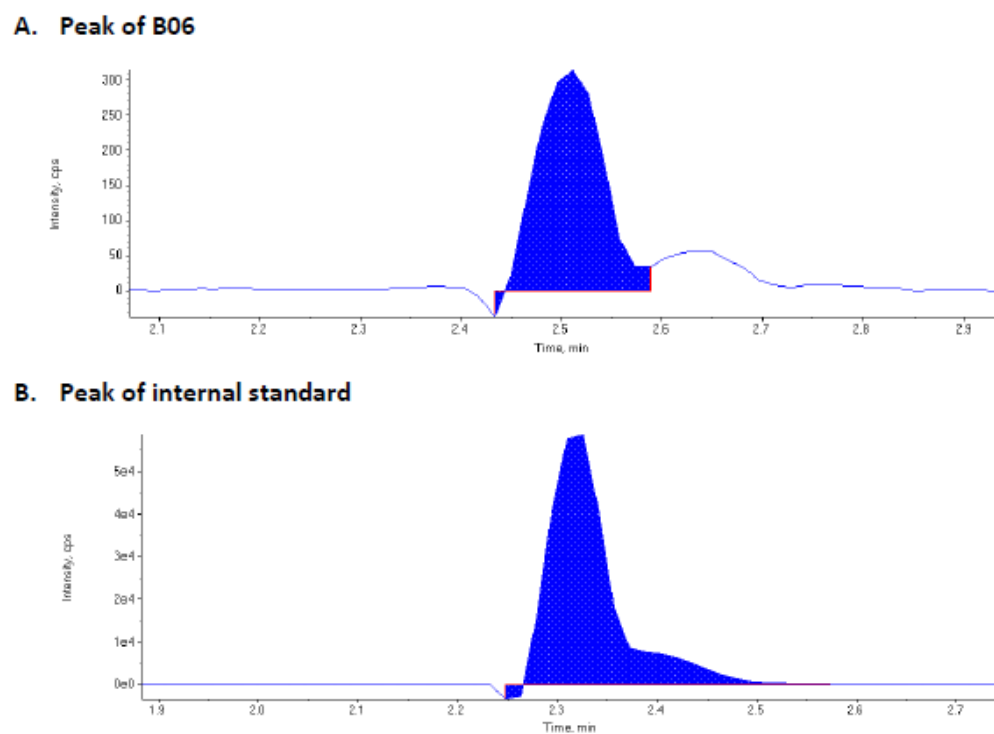

Figure S10. Standard curve of B06 in mouse plasma samples

Regression Equation Regression Equation:  $y = 0.00148 x + -0.00151$  ( $r = 0.9988$ ) (weighting:  $1 / x$ )

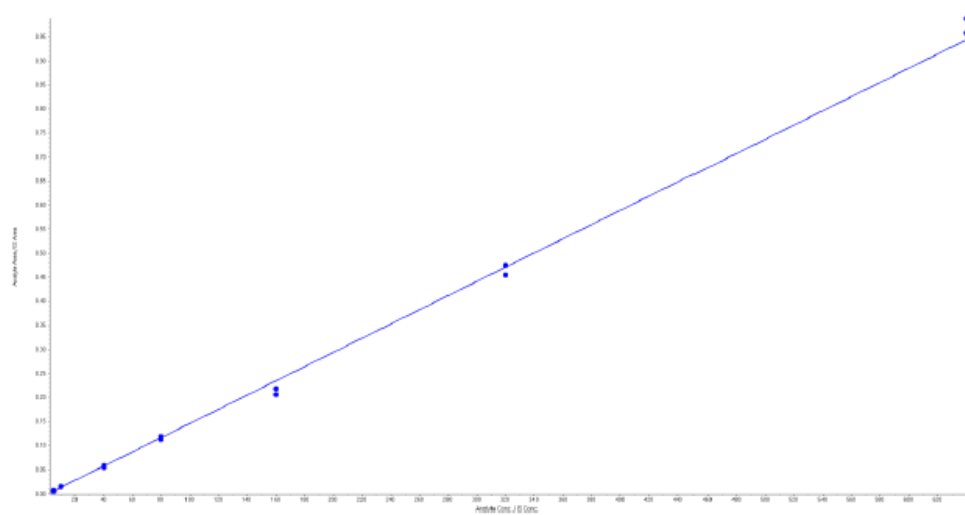

## Method validation for quantification of B06 in mouse brain

*Table S16. Specificity of B06 and internal standard in mouse brain samples*

|         | Peak area at B06<br>RT in Blank | Peak area at B06<br>RT in LLOQ<br>Sample | Blank<br>Peak area at B06<br>RT<br>(% of LLOQ) | Peak area at<br>IS RT in<br>Blank | Peak area at IS<br>RT in LLOQ<br>Sample | Blank<br>Peak area at<br>IS<br>(% of LLOQ) |
|---------|---------------------------------|------------------------------------------|------------------------------------------------|-----------------------------------|-----------------------------------------|--------------------------------------------|
| Blank 1 | 133.0                           | 1610                                     | 8.3                                            | 8.3                               | 312000                                  | 0.003                                      |
| Blank 2 | 90.5                            | 1560                                     | 5.8                                            | 24.8                              | 339000                                  | 0.007                                      |
| Blank 3 | 45.6                            | 1190                                     | 3.8                                            | 10.3                              | 206000                                  | 0.005                                      |
| Blank 4 | 116.0                           | 1330                                     | 8.7                                            | 35.1                              | 202000                                  | 0.017                                      |
| Blank 5 | 58.9                            | 1440                                     | 4.1                                            | 16.7                              | 215000                                  | 0.008                                      |
| Blank 6 | 54.0                            | 1470                                     | 3.7                                            | 22.0                              | 297000                                  | 0.007                                      |
| n       | 6                               | 6                                        | 6                                              | 6                                 | 6                                       | 6                                          |
| Mean    | 83                              | 1433                                     | 5.7                                            | 19.5                              | 261000                                  | 0.008                                      |

*Table S17. Auto-sampler carry over test of B06 and internal standard in mouse brain samples*

| Sample Name | Analyte | IS     | % Carry Over |      |
|-------------|---------|--------|--------------|------|
|             |         |        | Analyte      | IS   |
| STD BLANK   | 106     | 62     |              |      |
| LLOQ        | 1350    | 279000 |              |      |
| ULOQ        | 332000  | 224000 |              |      |
| STD BLANK   | 176     | 78     | 13.0         | 0.03 |

*Table S18. Back calculated values (ng/ml) data of cc standard for B06 in mouse brain samples*

| Run Date                              | STD Conc. (ng/ml) | 2.5   | 5.0  | 10.0 | 20.0 | 40.0 | 80.0 | 160.0 | 320.0 | 640.0 |
|---------------------------------------|-------------------|-------|------|------|------|------|------|-------|-------|-------|
| September                             | Run 1             | 2.7   | 4.9  | 9.7  | 18.4 | 37.7 | 75.7 | 158.8 | 326.1 | 654.5 |
|                                       | Run 2             | 3.0   | 4.5  | 8.2  | 18.8 | 36.9 | 79.1 | 150.9 | 328.2 | 636.5 |
| Mean Calculated Concentration (ng/mL) |                   | 2.9   | 4.7  | 9.0  | 18.6 | 37.3 | 77.4 | 154.8 | 327.2 | 645.5 |
| Accuracy (%)                          |                   | 114.1 | 94.1 | 89.7 | 92.9 | 93.2 | 96.7 | 96.8  | 102.2 | 100.9 |
| Precision (CV %)                      |                   | 7.9   | 7.3  | 12.3 | 1.6  | 1.5  | 3.1  | 3.6   | 0.4   | 2.0   |
| n                                     |                   | 2     | 2    | 2    | 2    | 2    | 2    | 2     | 2     | 2     |

*Table S19. Accuracy and precision of B06 in mouse brain samples*

| Run Date         | LQC<br>(5.0 ng/mL) | MQC<br>(71.1 ng/mL) | HQC<br>(640.0 ng/mL) |
|------------------|--------------------|---------------------|----------------------|
| September        | 5.3                | 65.0                | 611.6                |
|                  | 5.8                | 66.7                | 601.6                |
|                  | 5.8                | 65.8                | 606.0                |
|                  | 5.1                | 64.6                | 622.6                |
|                  | 5.4                | 61.9                | 624.7                |
|                  | 5.0                | 64.2                | 581.6                |
| Mean             | 5.4                | 64.7                | 608.0                |
| Precision (CV %) | 6.5                | 2.5                 | 2.6                  |
| Accuracy (%)     | 108.2              | 91.1                | 95.0                 |
| n                | 6                  | 6                   | 6                    |

*Figure S11. Blank sample chromatogram of B06 and internal standard in mouse brain samples*

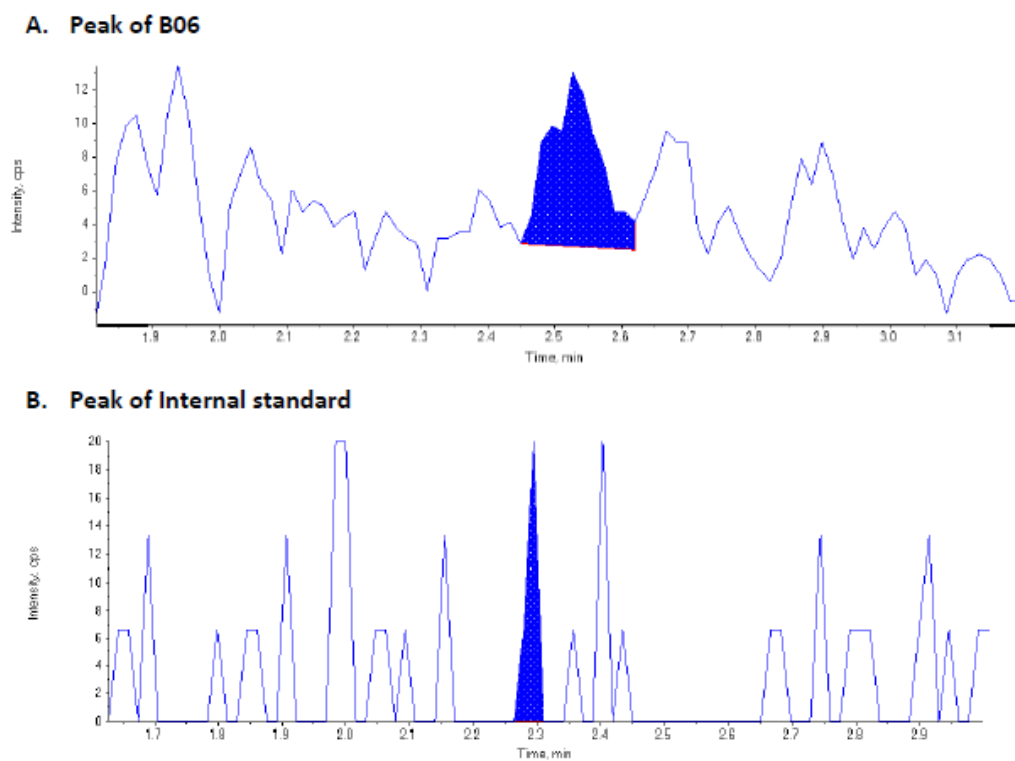

*Figure S12. Chromatogram of B06 and internal standard in LLOQ sample in mouse brain samples (concentration 2.5 ng/ml)*

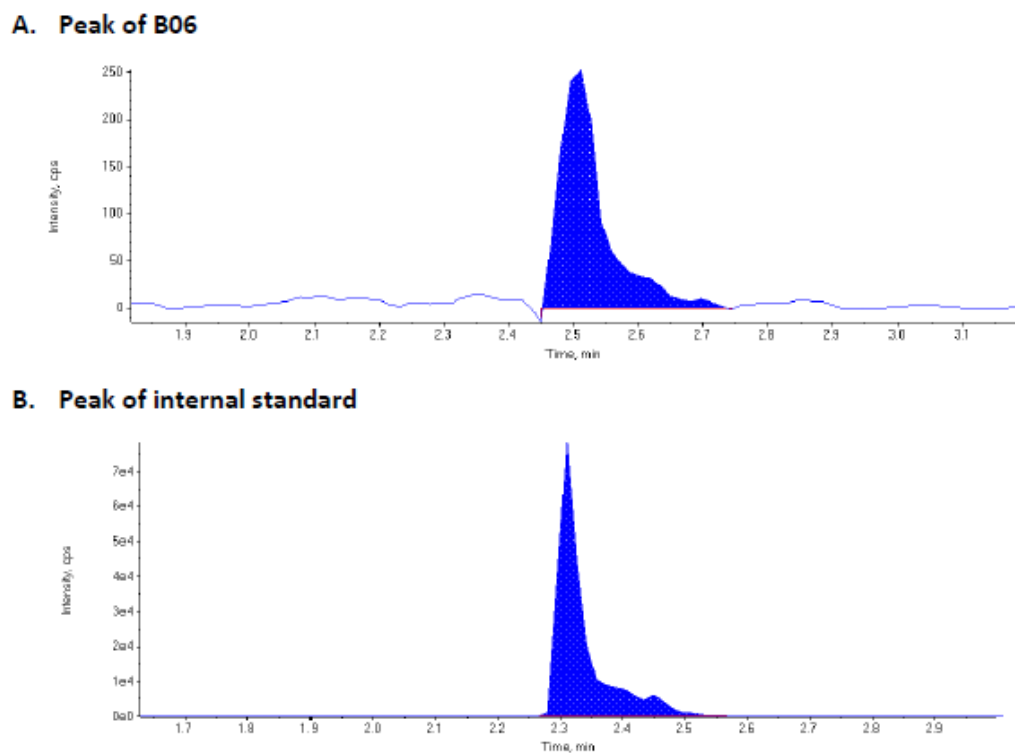

*Figure S13. Standard curve of B06 in mouse brain samples*

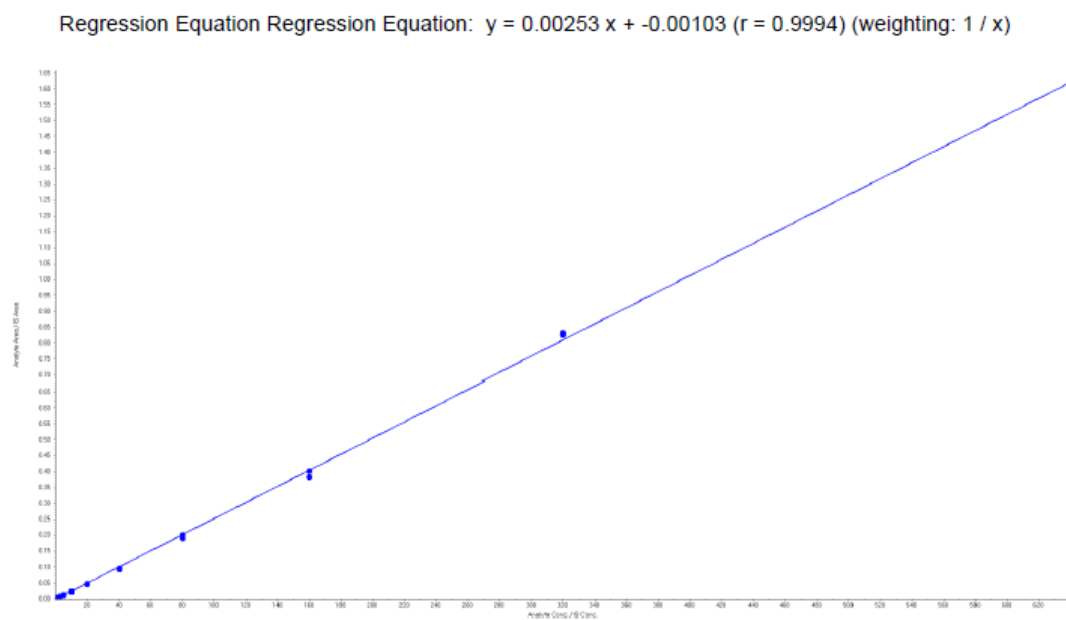

## ***In vivo* pharmacokinetics of B06**

**Figure S14. Calibration curve for B06 in plasma samples**

Regression Equation:  $y = 0.00119x + 0.000928$  ( $r = 0.9993$ )  $1/x$

| Expected Concentration | Number of Values | Mean Calculated Concentration | % Accuracy | Std. Deviation | %CV  |
|------------------------|------------------|-------------------------------|------------|----------------|------|
| 5                      | 2                | 4.46                          | 89.2       | 0.01           | 0.1  |
| 10                     | 2                | 10.69                         | 106.9      | 0.16           | 1.5  |
| 20                     | 2                | 20.71                         | 103.5      | 1.03           | 5.0  |
| 40                     | 2                | 39.52                         | 98.8       | 0.14           | 0.3  |
| 80                     | 2                | 80.13                         | 100.2      | 9.76           | 12.2 |
| 160                    | 2                | 167.83                        | 104.9      | 6.71           | 4.0  |
| 320                    | 3                | 310.72                        | 97.1       | 9.73           | 3.1  |
| 640                    | 3                | 643.73                        | 100.6      | 13.41          | 2.1  |

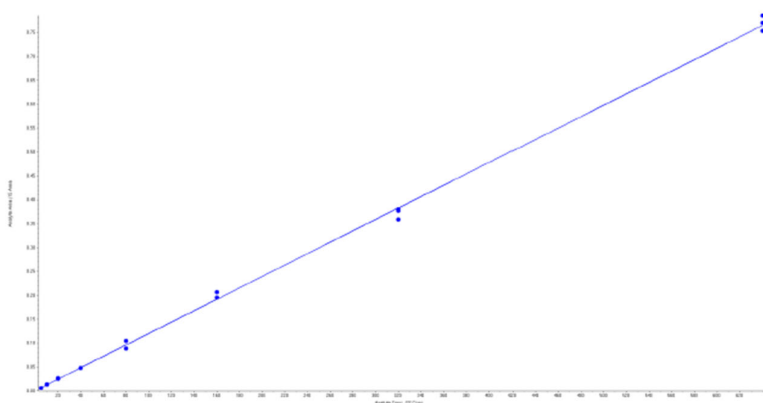

**Table S20. Quantitation for B06 in plasma samples at dosing 10 mg/kg and samples grouping and statistics in plasma samples**

| Sample Name | Time (minutes) | 10 mg/Kg Final. Conc. (ng/mL) |
|-------------|----------------|-------------------------------|
| 1           | 5              | 603                           |
| 2           | 5              | 79                            |
| 3           | 5              | 317                           |
| 4           | 15             | 1580                          |
| 5           | 15             | 332                           |
| 6           | 15             | 939                           |
| 7           | 30             | 263                           |
| 8           | 30             | 293                           |
| 9           | 30             | 320                           |
| 10          | 60             | 577                           |
| 11          | 60             | 125                           |
| 12          | 60             | 185                           |
| 13          | 120            | 138                           |
| 14          | 120            | 225                           |
| 15          | 120            | 391                           |
| 16          | 240            | < 5                           |
| 17          | 240            | 123                           |
| 18          | 240            | 315                           |
| 19          | 360            | 90                            |
| 20          | 360            | 146                           |
| 21          | 360            | 96.6                          |
| 22          | 480            | 81.8                          |
| 23          | 480            | 156                           |
| 24          | 480            | 174                           |
| 25          | 1440           | 11                            |
| 26          | 1440           | 14                            |
| 27          | 1440           | 15                            |



Table S21. Samples Grouping and statistics in plasma samples

| N | Extraction_time<br>(minutes) | Mean<br>(ng/mL) | SD<br>(ng/mL) | CV%  |
|---|------------------------------|-----------------|---------------|------|
| 3 | 5                            | 333.0           | 262.4         | 78.8 |
| 3 | 15                           | 950.3           | 624.1         | 65.7 |
| 3 | 30                           | 292.0           | 28.5          | 9.8  |
| 3 | 60                           | 295.7           | 245.5         | 83.0 |
| 3 | 120                          | 251.3           | 128.5         | 51.1 |
| 3 | 240                          | 219.0           | 135.8         | 62.0 |
| 3 | 360                          | 110.9           | 30.6          | 27.6 |
| 3 | 480                          | 137.3           | 48.9          | 35.6 |
| 3 | 1440                         | 13.3            | 2.1           | 15.6 |

Figure S15. B06 concentration in plasma samples vs. extraction time

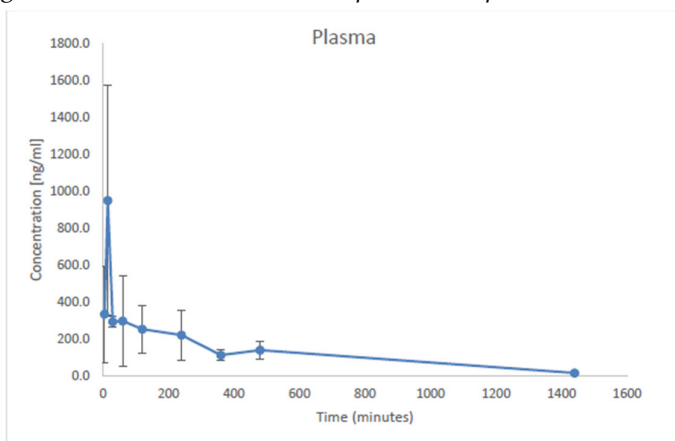

Figure S16. Calibration curve for B06 in brain samples

Regression Equation:  $y = 0.00212x + 0.00082$  ( $r = 0.9992$ )  $1/x$

| Expected Concentration | Number of Values | Mean Calculated Concentration | % Accuracy | Std. Deviation | %CV  |
|------------------------|------------------|-------------------------------|------------|----------------|------|
| 2.5                    | 2                | 2.5                           | 101.0      | 0.2            | 9.1  |
| 5                      | 2                | 5.2                           | 103.8      | 0.5            | 9.3  |
| 10                     | 2                | 10.4                          | 104.2      | 0.4            | 3.8  |
| 20                     | 2                | 20.1                          | 100.4      | 1.1            | 5.3  |
| 40                     | 2                | 40.6                          | 101.6      | 4.1            | 10.0 |
| 80                     | 2                | 83.0                          | 103.7      | 6.0            | 7.2  |
| 160                    | 2                | 156.5                         | 97.8       | 7.3            | 4.7  |
| 320                    | 2                | 322.5                         | 100.8      | 24.8           | 7.7  |
| 640                    | 2                | 636.9                         | 99.5       | 3.4            | 0.5  |

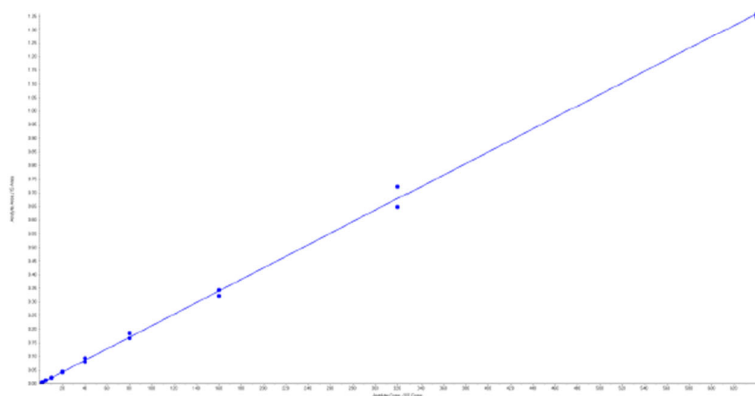

Table S22. Quantitation for B06 in brain samples at dosing 10 mg/kg and samples grouping and statistics in brain samples

| B06 | TIME<br>(minutes) | CONCENTRATION<br>(ng/ml) | CONCENTRATION (ng/g<br>tissue) |
|-----|-------------------|--------------------------|--------------------------------|
| 1   | 5                 | 17.2                     | 60.2                           |
| 2   | 5                 | 3.2                      | 11.2                           |
| 3   | 5                 | 12.5                     | 43.75                          |
| 4   | 15                | 51.8                     | 181.3                          |
| 5   | 15                | 12.2                     | 42.7                           |
| 6   | 15                | 46.1                     | 161.35                         |
| 7   | 30                | 15.0                     | 52.5                           |
| 8   | 30                | 14.1                     | 49.35                          |
| 9   | 30                | 14.7                     | 51.45                          |
| 10  | 60                | 19.4                     | 67.9                           |
| 11  | 60                | 4.4                      | 15.4                           |
| 12  | 60                | 8.71                     | 30.485                         |
| 13  | 120               | 6.62                     | 23.17                          |
| 14  | 120               | 6.95                     | 24.325                         |
| 15  | 120               | 10.8                     | 37.8                           |
| 16  | 240               | < 2.5                    | N.d.                           |
| 17  | 240               | 4.9                      | 17.15                          |
| 18  | 240               | 15.5                     | 54.25                          |
| 19  | 360               | < 2.5                    | N.d.                           |
| 20  | 360               | 3.96                     | 13.86                          |
| 21  | 360               | 2.69                     | 9.415                          |
| 22  | 480               | < 2.5                    | N.d.                           |
| 23  | 480               | 4.46                     | 15.6                           |
| 24  | 480               | 4.68                     | 16.4                           |
| 25  | 1440              | < 2.5                    | N.d.                           |
| 26  | 1440              | < 2.5                    | N.d.                           |
| 27  | 1440              | < 2.5                    | N.d.                           |

N.d. = Non-determined

Table S23. Samples grouping and statistics in brain samples

| N | Extraction_time<br>(hours) | Mean<br>(ng/g tissue) | SD<br>(ng/g tissue) | CV%  |
|---|----------------------------|-----------------------|---------------------|------|
| 3 | 5                          | 38.4                  | 24.9                | 65.0 |
| 3 | 15                         | 128.5                 | 74.9                | 58.3 |
| 3 | 30                         | 51.1                  | 1.6                 | 3.1  |
| 3 | 60                         | 37.9                  | 27.0                | 71.3 |
| 3 | 120                        | 28.4                  | 8.1                 | 28.6 |
| 2 | 240                        | 35.7                  | 26.2                | 73.5 |
| 2 | 360                        | 11.6                  | 3.1                 | 27.0 |
| 2 | 480                        | 16.0                  | 0.6                 | 3.5  |

Figure S17. B06 concentration in brain samples vs. extration time

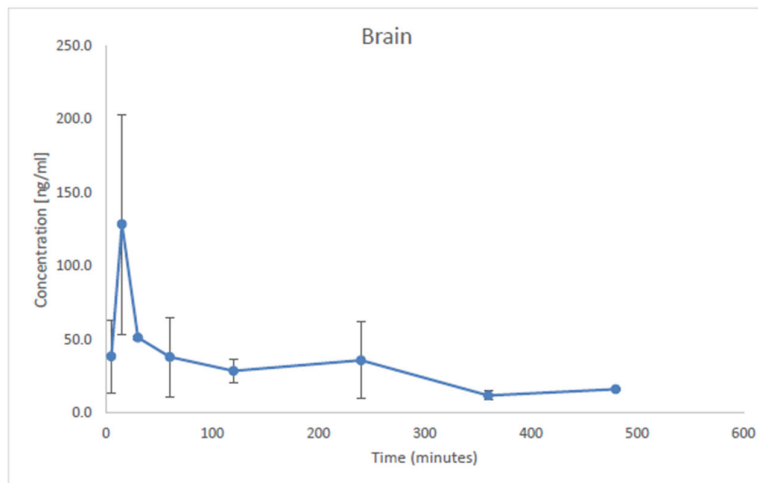

## SH-SY5Y Human Cell Line

*Figure S18. Study of the cytotoxic effect of I2-IR ligands on human dopaminergic cells*

Cell line SH-SY5Y was treated for 24h with compounds B06, Idazoxan and 2-BFI at different concentrations from 0.2 to 20  $\mu$ M. The cytotoxic effect of the compounds was analyzed by MTT assay. Values represent the mean  $\pm$  SD from triplicate determinations repeated at least three times.

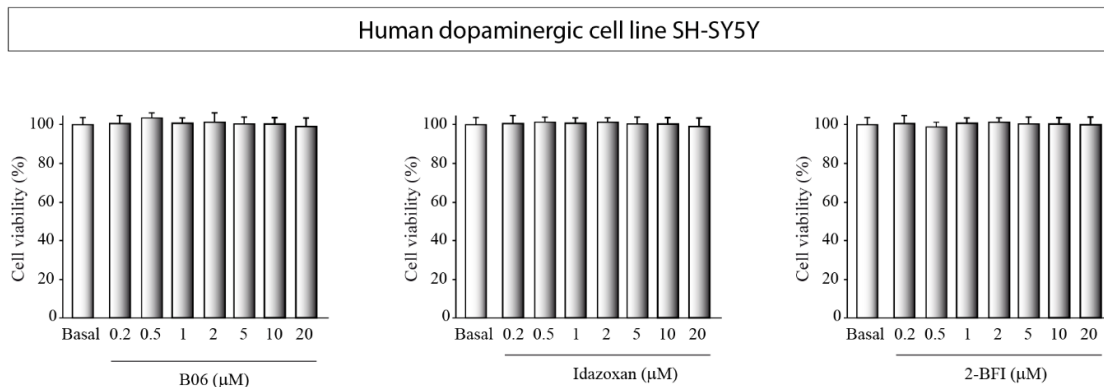

<sup>1</sup>H and <sup>13</sup>C NMR spectra

Diethyl (1R,3aSR,6aSR)-5-(3-chloro-4-fluorophenyl)-4,6-dioxo-1-phenyl-1,3a,4,5,6,6a-hexahydropyrrolo[3,4-c]pyrrole-1-phosphonate (B06)

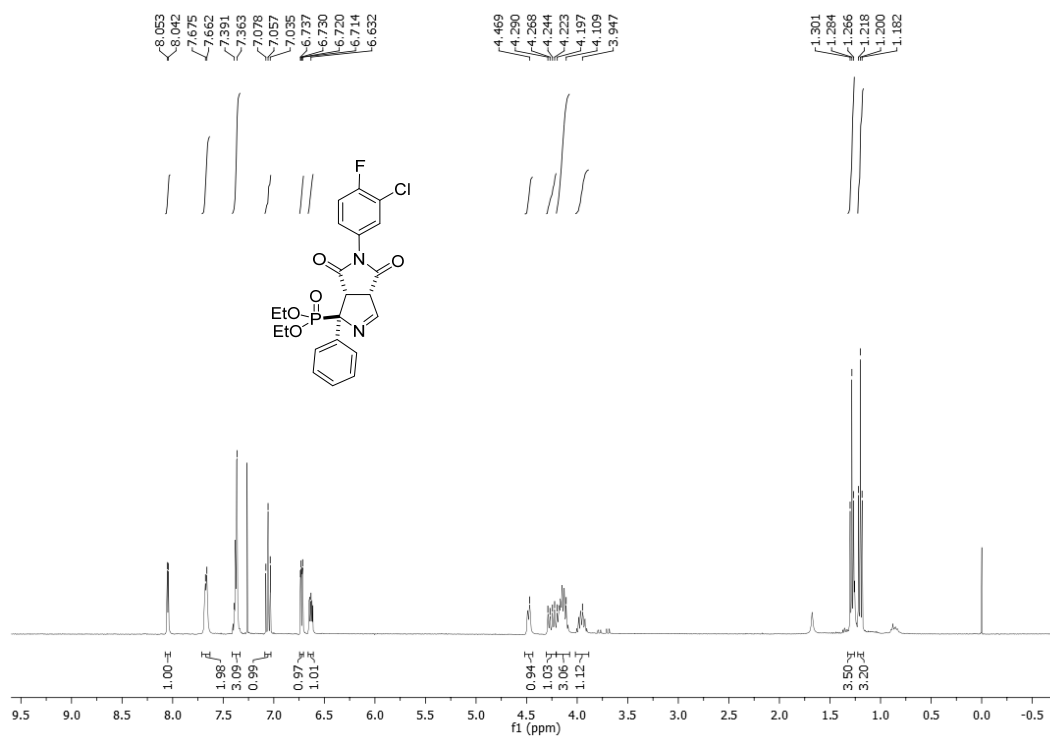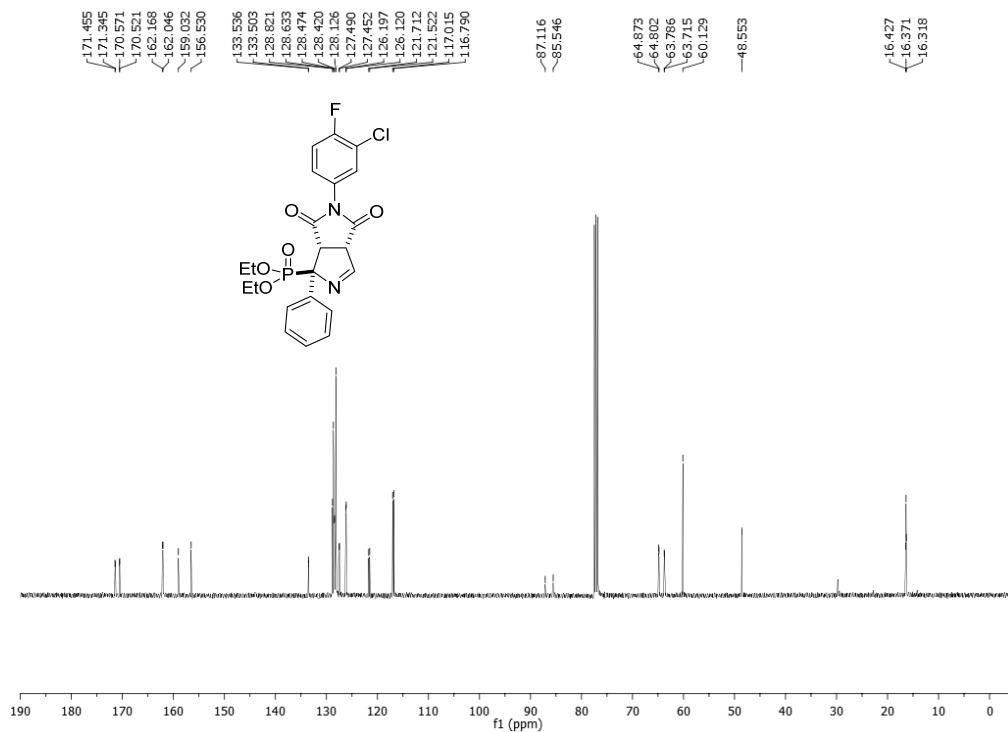

**Ethyl hydrogen ((1R,3aS,6aS)-5-(3-chloro-4-fluorophenyl)-4,6-dioxo-1-phenyl-1,3a,4,5,6,6a-hexahydropyrrolo[3,4-c]pyrrol-1-yl)phosphonate (1)**

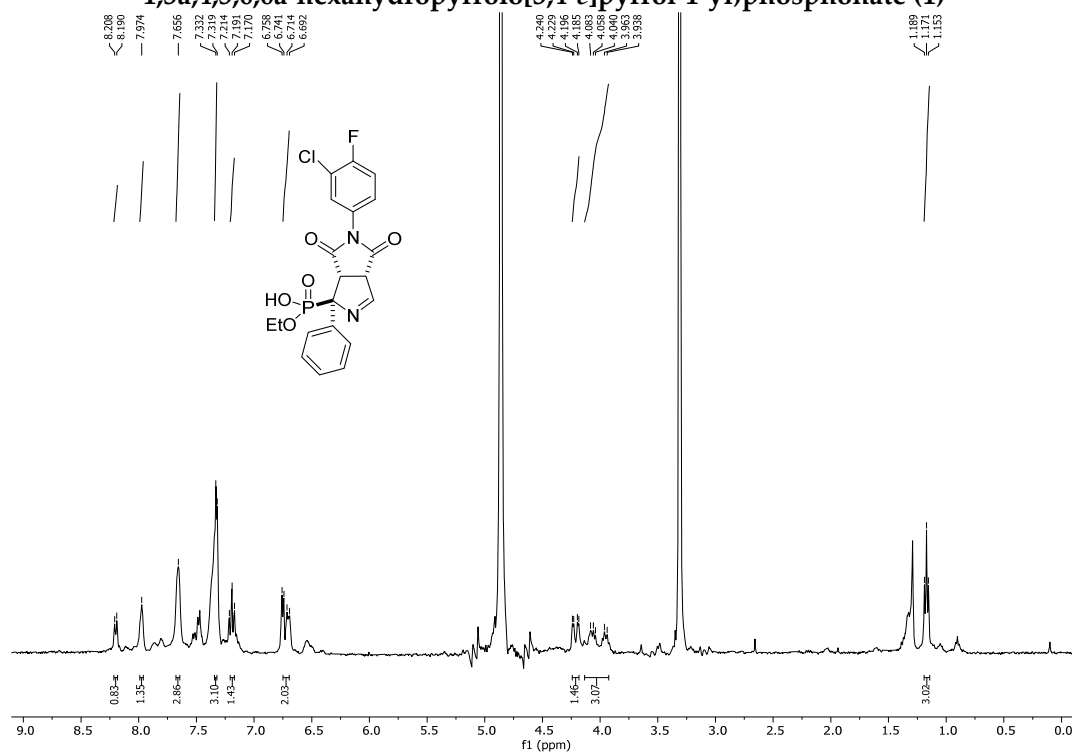

**((1R,3aS,6aS)-5-(3-chloro-4-fluorophenyl)-4,6-dioxo-1-phenyl-1,3a,4,5,6,6a-hexahydropyrrolo[3,4-c]pyrrol-1-yl)phosphonic acid**

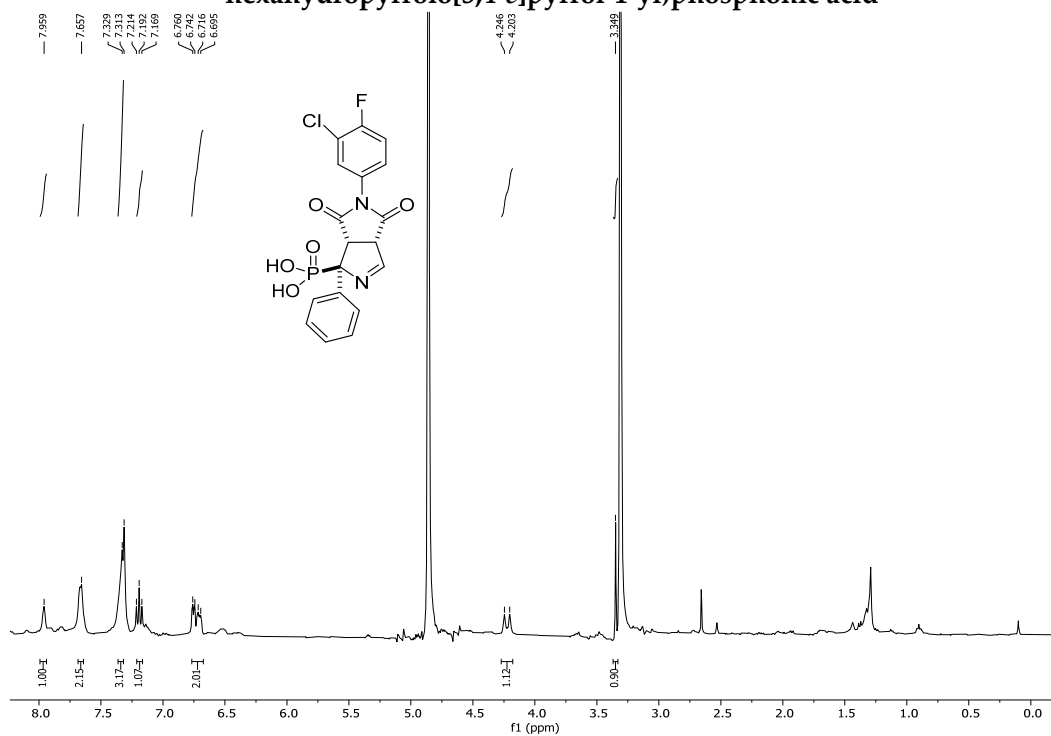

## Representative data of <sup>1</sup>H-NMR spectra

Table S24. <sup>1</sup>H chemical shifts for new compounds including both the multiplicity and the coupling constants

| Compound                                                                                        | CH <sub>2</sub> CH <sub>3</sub> | CH <sub>2</sub> CH <sub>3</sub> | H3               | H6a                     | H3a            |
|-------------------------------------------------------------------------------------------------|---------------------------------|---------------------------------|------------------|-------------------------|----------------|
| 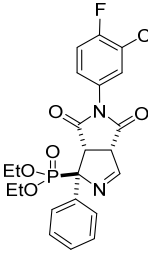<br><b>B06</b> | 1.20<br>t<br>7.0                | 1.28<br>t<br>7.0                | 8.05<br>d<br>4.5 | 4.25<br>dd<br>8.0, 18.0 | 4.47<br>m      |
| <br><b>1</b>   | 1.17<br>t<br>7.0                | -                               | 8.20<br>d<br>7.5 | 4.21<br>dd<br>4.5, 17.5 | 3.87-4.13<br>m |
|              | -                               | -                               | 7.96<br>s        | 4.22<br>d<br>17.0       | 3.35<br>s      |

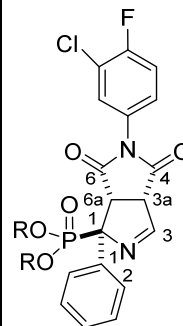

## HPLC/MS analysis

### Diethyl (1*RS*,3*aSR*,6*aSR*)-5-(3-chloro-4-fluorophenyl)-4,6-dioxo-1-phenyl-1,3*a*,4,5,6,6*a*-hexahydropyrrolo[3,4-*c*]pyrrole-1-phosphonate (B06)

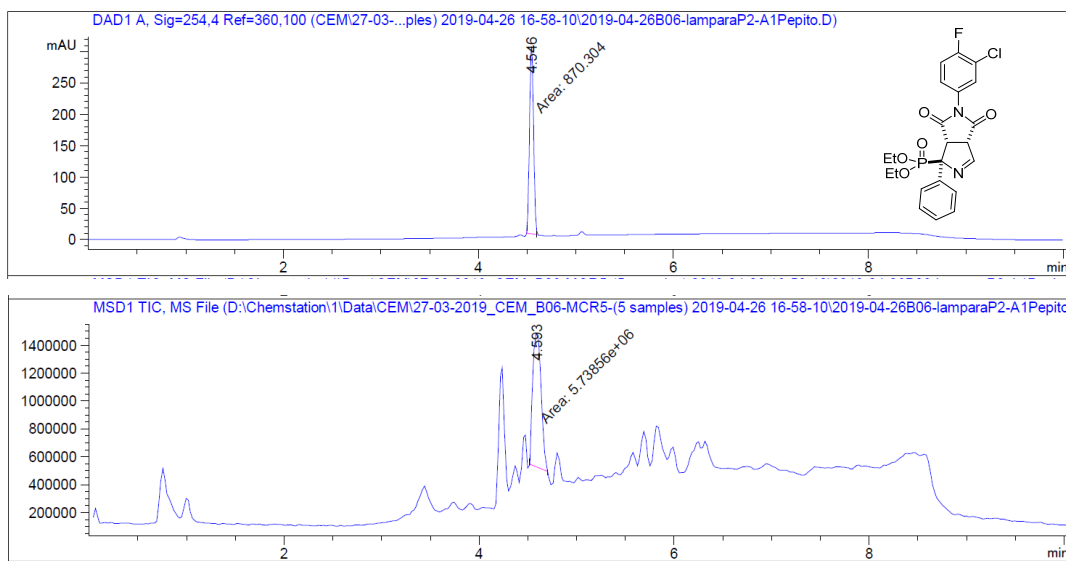

Signal 1: DAD1 A, Sig=254,4 Ref=360,100

| Peak # | RetTime [min] | Type | Width [min] | Area [mAU*s] | Height [mAU] | Area %   |
|--------|---------------|------|-------------|--------------|--------------|----------|
| 1      | 4.546         | MM   | 0.0483      | 870.30444    | 300.38943    | 100.0000 |

Totals : 870.30444 300.38943

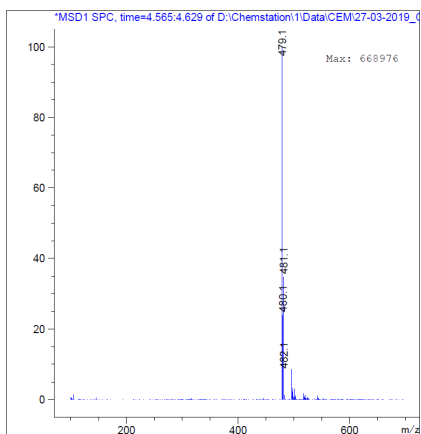



Ethyl hydrogen ((1R,3aS,6aS)-5-(3-chloro-4-fluorophenyl)-4,6-dioxo-1-phenyl-  
1,3a,4,5,6,6a-hexahydropyrrolo[3,4-c]pyrrol-1-yl)phosphonate (1)

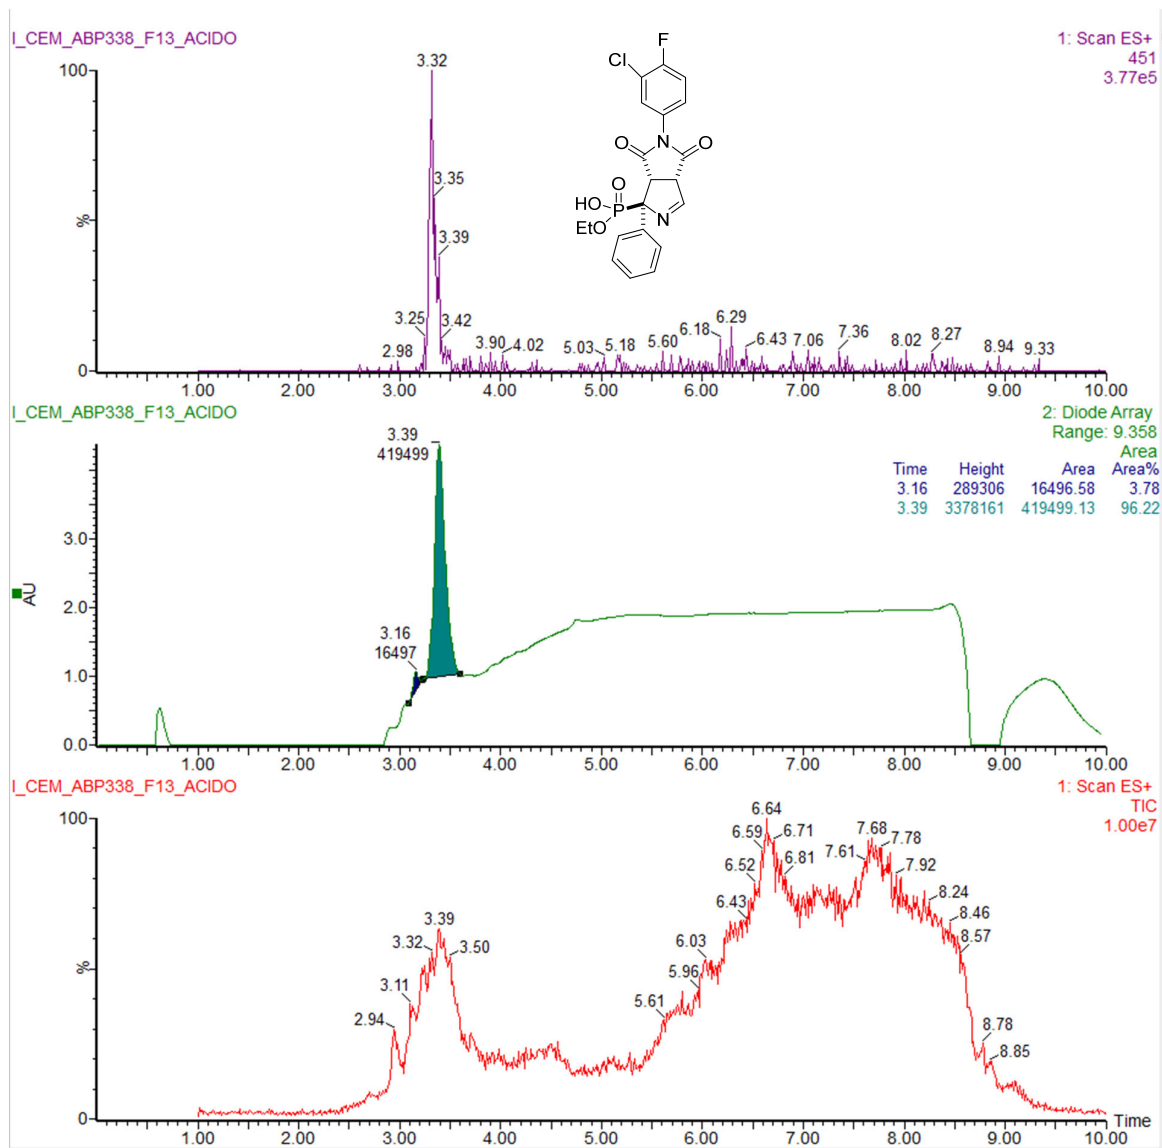

**((1R,3aS,6aS)-5-(3-chloro-4-fluorophenyl)-4,6-dioxo-1-phenyl-1,3a,4,5,6,6a-hexahydropyrrolo[3,4-c]pyrrol-1-yl)phosphonic acid**

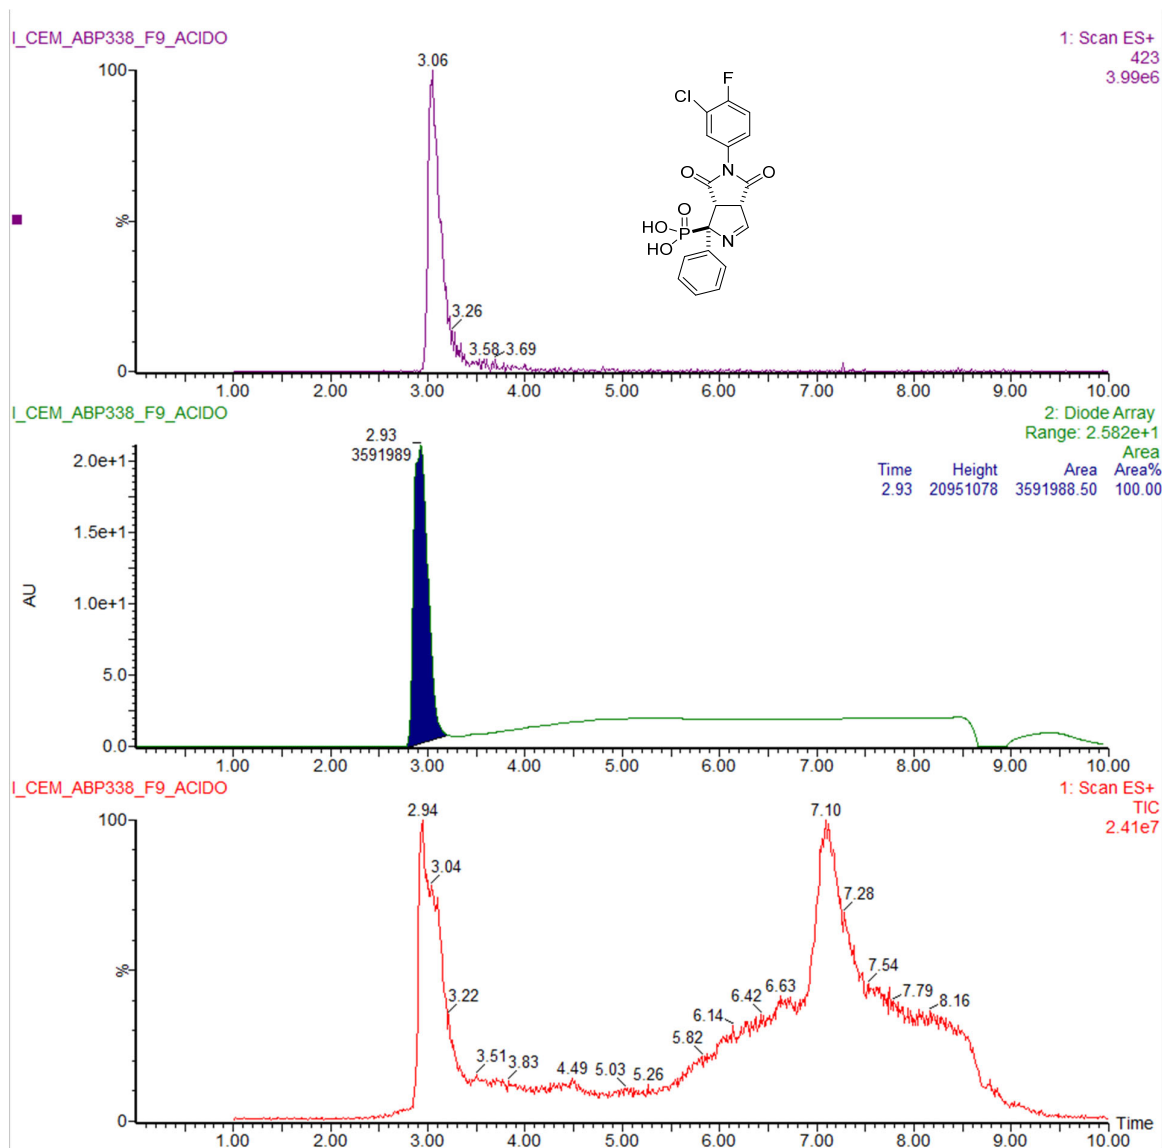

Supplement: s1 [file s1]
